# Supplementary material for: Intracellular Insulin-like growth factor binding protein 2 (IGFBP2) contributes to the senescence of keratinocytes in psoriasis by stabilizing cytoplasmic p21
Source: publisher site journal article supplement (doi:10.18632/aging.103045), 2020-04-17
Supplement: Supplementary file [file aging-v12i8-103045-supplementary-material-SD1.pdf]

**SUPPLEMENTARY FIGURES**

**A**

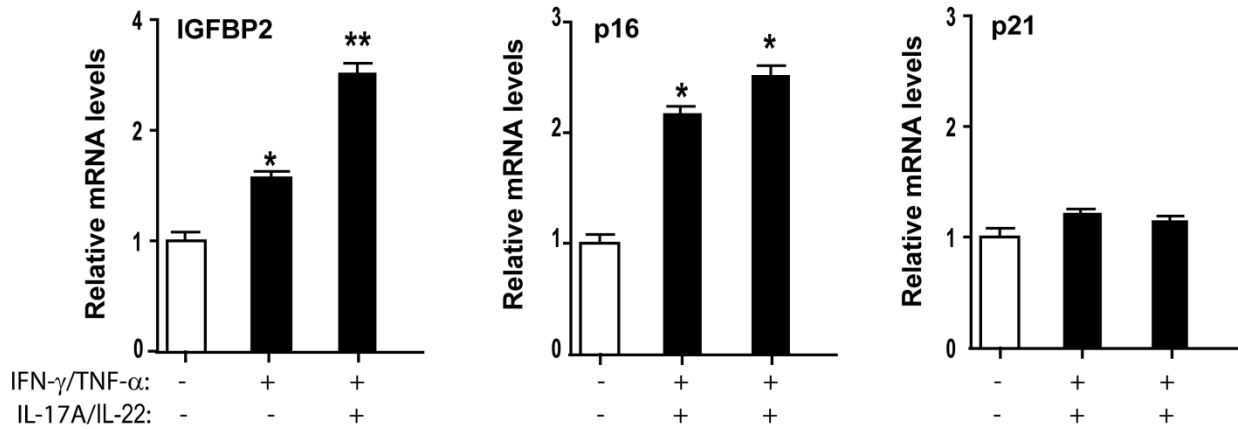

**B**

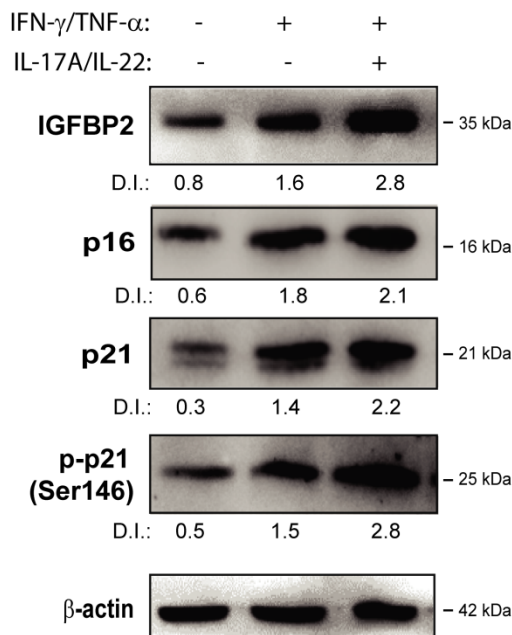

**Supplementary Figure 1. IGFBP2 expression is upregulated by pro-inflammatory cytokines in psoriatic keratinocytes. (A, B)** Transcriptional and protein levels of IGFBP2, p16 and p21 were detected by Real-time PCR analysis and WB, respectively, on keratinocytes isolated from NLS biopsies and cultured at passage P4. Cells were treated with IFN- $\gamma$  and TNF- $\alpha$ , alone or in presence of IL-17A and IL-22 for 6 hours for transcriptional analysis, and for 18 hours for WB analysis. \* $p \leq 0.05$ , \*\* $p \leq 0.01$ , as assessed by paired Student's  $t$  test comparing untreated and cytokine-treated. The protein levels of phosphorylated p21 was also detected by WB. In (B), D.I. indicates mean values of densitometric intensity of each band obtained from three independent experiments.

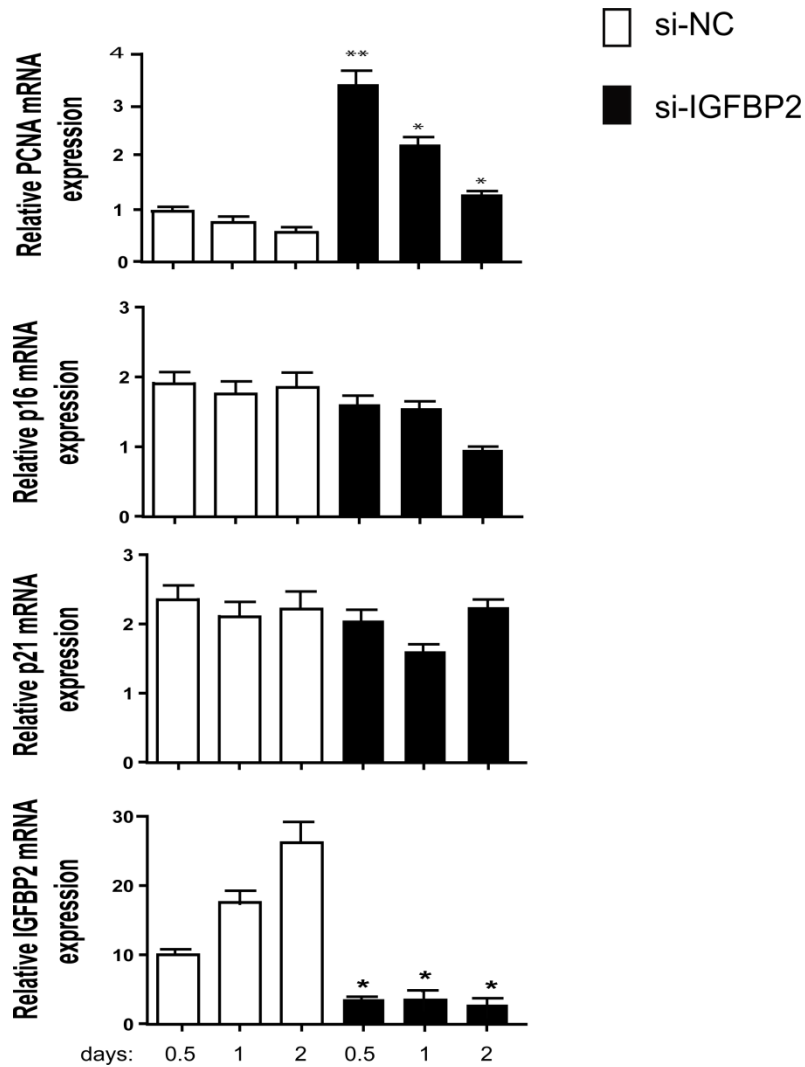

**Supplementary Figure 2. IGFBP2 suppression does not influence transcriptional expression of p21 and p16, but induces PCNA mRNA expression.** mRNA levels of PCNA, p16, p21 and IGFBP2 were detected by Real-time-PCR analysis on total RNA obtained from pso KC cultures (at P4 passage) transiently silenced for IGFBP2 (si-IGFBP2) or control cells (si-NC) at different time-points. Data shown are means of relative mRNA expression (normalized to  $\beta$ -actin) of three independent experiments. \* $p \leq 0.05$ , as assessed by paired Student's *t* test comparing si-IGFBP2 with si-NC groups at the same time-point.

**A**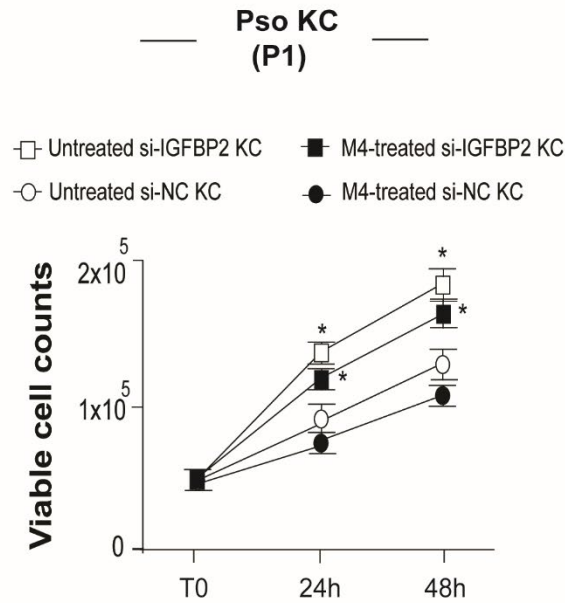**B**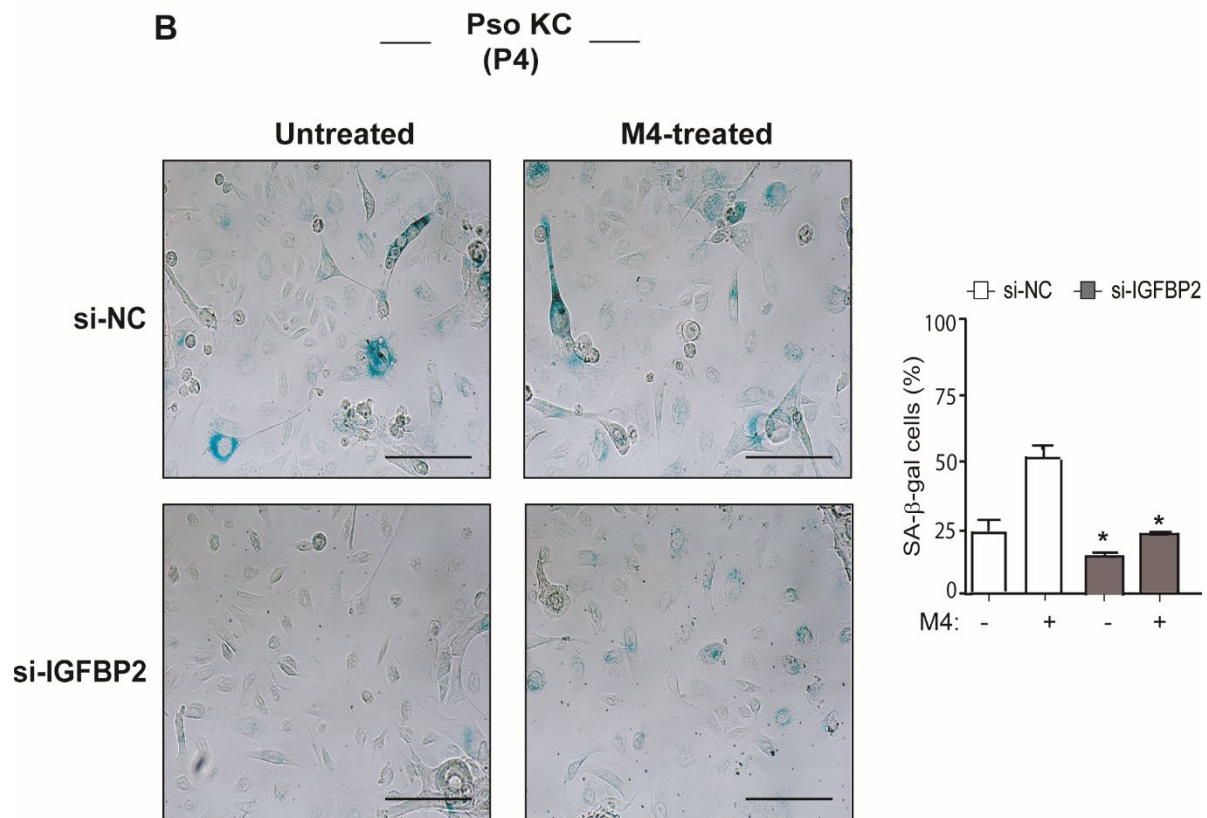

**Supplementary Figure 3. IGFBP2 abrogation determines an enhanced proliferation and a reduced  $\beta$ -galactosidase activity in pso KC cultures.** (A) Cell proliferation was evaluated in pso KC transiently transfected with NC- or IGFBP2-siRNA at passage P1, left untreated or M4-treated (24h and 48h after transfection), by using Trypan blue exclusion assay. (B) The activity of senescence-associated  $\beta$ -galactosidase (SA- $\beta$ -gal) was detected by colorimetric staining (blue) in pso KC cultures at passage P4, silenced or not for IGFBP2, left untreated or M4-treated. Data are representative of three independent experiments. Bars, 100  $\mu$ m. The graph shows the means of SA- $\beta$ -gal positive cells  $\pm$  SD, counted in two adjacent fields. \* $p \leq 0.05$ , as assessed by paired Student's  $t$  test comparing si-IGFBP2 with si-NC groups.

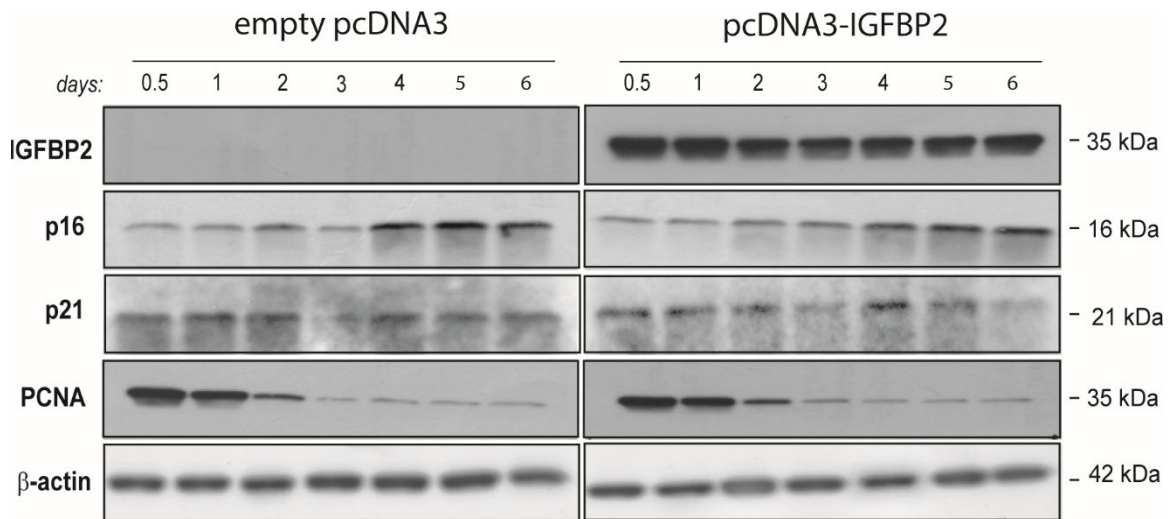

**Supplementary Figure 4. IGFBP2 over-expression does not affect senescence markers in healthy keratinocytes.** WB analysis of healthy KC at passage 2 (P2) transfected with the empty expression vector pcDNA3 (empty-pcDNA3, left panel) or with the vector bearing IGFBP2 (pcDNA3-IGFBP2, right panel) at different time-points, as indicated, to detect IGFBP2, p16, p21 and PCNA protein levels. Results showed are representative of three independent experiments.

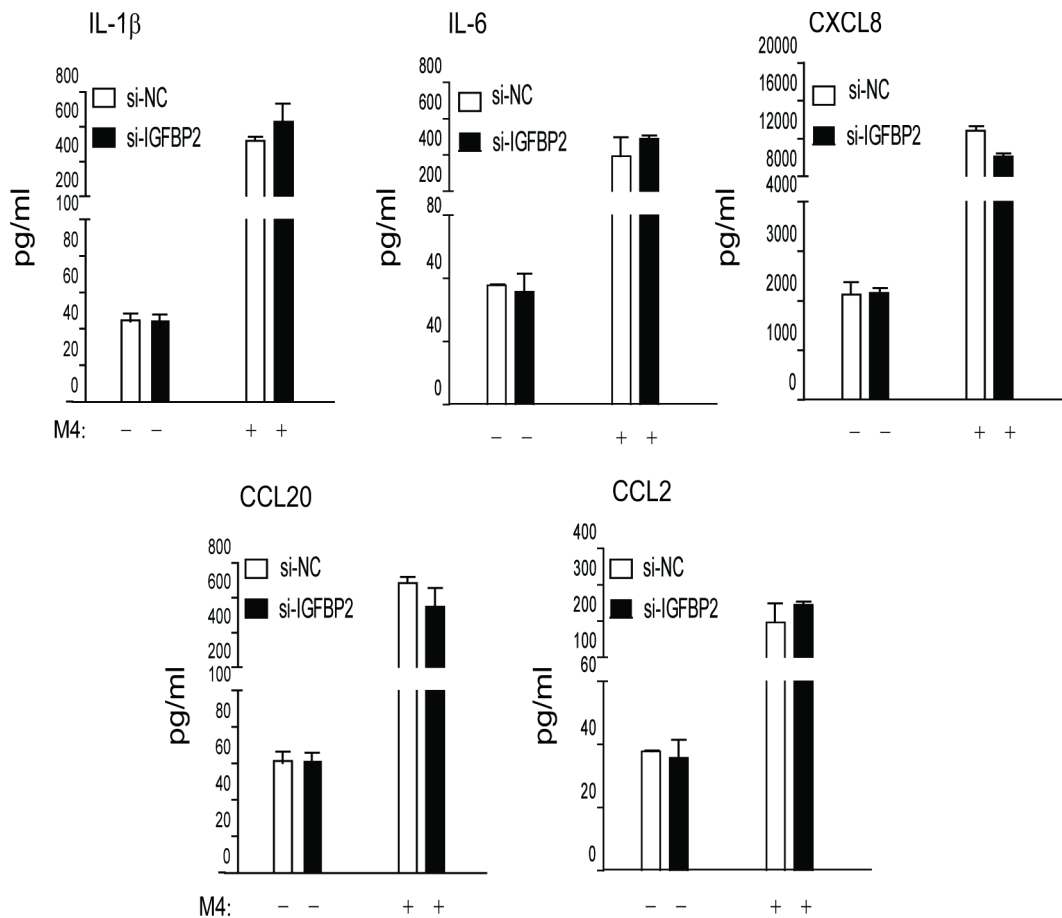

**Supplementary Figure 5. IGFBP2 abrogation does not affect SASP in pso KC cultures.** IL-1 $\beta$ , IL-6, CXCL8, CCL20 and CCL2 production was evaluated by ELISA on supernatants obtained from pso KC cultures silenced or not for IGFBP2 at passage P4 and stimulated or not for 24 h with M4. Results are expressed as means of pg/ml  $\pm$  SD of three different experiments.
