# Supplementary material for: Intracellular Insulin-like growth factor binding protein 2 (IGFBP2) contributes to the senescence of keratinocytes in psoriasis by stabilizing cytoplasmic p21
Source: publisher site journal article supplement (doi:10.18632/aging.103045), 2020-04-17
Supplement: Supplementary file [file aging-v12i8-103045-supplementary-material-SD2.pdf]

## SUPPLEMENTARY TABLE

Supplementary Table 1. List of primers used for quantitative real-time PCR.

| Gene           | forward                  | reverse                    |
|----------------|--------------------------|----------------------------|
| IGFBP2         | GCCCCGAGCAGGTTGC         | ACTGCCTCCCCCGCC            |
| IGFBP3         | TGTGGCCATGACTGAGGAAA     | TGCCAGACCTTCTTGGGTTT       |
| p16            | CAACGCACCGAATAGTTACGG    | CCACTCGGGCGCTGC            |
| p21            | CAGGGTCGAAAACGGCG        | GGCGTTGGAGTGGTAGAAATC      |
| Cdk1           | TTGAAAGCGAGGAAGAAGGA     | CCCTGGAGGATTTGGTGTA        |
| Cyclin A       | GCCATTAGTTTACCTGGACCCAGA | CACTGACATGGAAGACAGGAACCT   |
| p57            | ACCTTCCAGTACTAGTGCG      | AAGTCGTAATCCCAGCGGTT       |
| PCNA           | TTGGCGCTAGTATTTGAAGCAC   | TTCATAGTCTGAACTTTCTCCTGGTT |
| CXCL-8         | CTCTGTGTGAAGGTGCAGTTTT   | GGGTGGAAAGGTTTGGAGTAT      |
| $\beta$ -actin | TCCTGGGCATGGAGTCCTGT     | TCGGCAATGCCAGGGTACAT       |
| GAPDH          | TGGACCTGACCTGCCGTCTA     | CCCTGTTGCTGTAGCCAAATT      |
